# Supplementary material
Source: PubMed Central journal article supplement (PMC7515689)
Supplement: bloodBLD2020006868-suppl1.pdf [file bloodBLD2020006868-suppl1.pdf]

## SUPPLEMENTARY METHODS

### Single cell DNA sequencing analysis

Out of the 58 dual RNA splicing factor mutant patients included in our bulk sequencing analysis, 30 were treated at either MSKCC or Mayo Clinic and therefore potentially available for single cell analysis. From these 30 samples, only 15 samples were available as viably frozen cells and, ultimately, only 11 out of the 15 samples had viability >90% when thawed.

Pooled single cell DNA libraries were sequenced on Illumina MiSeq with paired-end multiplex runs (2 x 150 bp). Raw sequencing reads in FASTQ files were processed using the Tapestry Pipeline, which uses Bluebee's High Performance Genomics Platform. The pipeline trims adapter information, aligns sequences to the reference genome (hg19), assigns sequence reads to individual cell barcodes, calls genotypes using GATK, and generates annotated loom files. Resulting data that met the following filtering criteria were included for downstream analysis (**Supplementary Table 5**): read depth > 10, genotype quality (i.e., difference between the likelihoods of the two most likely genotypes on a scale of 0-99) > 30, alternate allele frequency (i.e., number of reads that support each of the reported alleles) > 20, variants genotyped in > 10% of cells, variants mutated in >1% of cells, and cells with >50% of genotypes present. VAFs were determined by aggregated reads from filtered cells, i.e. number of reads with variant of interest / number of total reads. The co-occurrence or mutual exclusivity of the dual splicing factor alterations was calculated at the same time as the rate of allele dropout (ADO) using the Bayesian statistical package STAN<sup>1</sup>. Since ADO of the relevant splicing factors can strongly influence the observed degree of co-occurrence, it was modeled under the assumption that splicing factor alterations were diploid and either wild-type or heterozygous in all cells and also that mutant and wild-type alleles are equally likely to be amplified. The estimated median ADO rate was 22% overall (IQR: 14% - 26%) but 73.9% (ICR: 68 - 77%) at the locus encoding SRSF2 P95. We attempted to address this by jointly estimating the co-occurrence of *SF3B1*, *SRSF2*, and *U2AF1* mutations and ADO at both loci under the assumption that hotspot mutations in these genes were diploid and either wild-type or heterozygous in all cells.

Subclones from each sample were identified using Tapestry Insights and annotated NGS data were subsequently analyzed in R. Oncoprints were generated where each column represents an individual cell and each row represents a mutation. Cells were clustered by subclone and then arranged by size of subclones from large to small. Pairwise associations between mutations were evaluated by Fisher's exact test with correction for multiple testing

using the Benjamini-Hochberg method. The order of mutations in each sample was inferred based on the principle of maximum parsimony and depicted on fishplots in accordance with the proportions of the subclones.

### **U2AF1 allele-specific sequencing**

Cryopreserved BM MNCs from a patient with co-occurring U2AF1<sup>S34F</sup> and U2AF1<sup>Q157R</sup> mutations by bulk and single cell DNA sequencing were thawed and lysed in TRI Reagent®. Total RNA was extracted using the Direct-zol™ RNA MiniPrep. Next, RT-PCR was performed using the QIAGEN One-Step RT-PCR Kit with the following primers: forward, 5'-GGCACCGAGAAAGACAAAGT-3'; reverse, 5'-AGCTCTCTGGAAATGGGCTT-3'. The PCR product was confirmed by gel electrophoresis and purified using the QIAquick PCR Purification Kit. Next, the U2AF1 PCR product was cloned into the pGEM®-T vector at a 3:1 insert to vector molar ratio. The ligated product was transformed into NEB® Turbo Competent E. coli (High Efficiency). Transformed bacteria were then plated onto LB agar plates with 100 µg/ml ampicillin, 0.1 mM IPTG, and 80 µg/ml X-Gal and incubated for overnight hours at 37°C. The resulting white colonies generally contain inserts whereas the blue colonies contain empty vectors. White colonies were thus selected for Sanger sequencing using the T7 primer which binds upstream of the insert on the vector backbone. U2AF1<sup>S34F</sup> results from a C-to-T mutation that changes the codon from TCT to TTT. U2AF1<sup>Q157R</sup> results from an A-to-G mutation that changes the codon from CAG to CGG.

### **Genome annotations and RNA-seq read mapping**

Genome annotations for RNA-seq read mapping to the NCBI GRCh37 / UCSC hg19 human genome assembly were created as previously described<sup>2</sup>. In brief, genome annotations from Ensembl release 71 and the UCSC knownGene track were merged with isoform annotations from the MISO v2.0 annotation to create a merged gene and isoform annotation<sup>3-5</sup>. RNA-seq reads were mapped to this merged annotation using RSEM v1.2.4, modified to call Bowtie v1.0.0 using the option '-v 2'<sup>6,7</sup>. RNA-seq reads that were not aligned to the transcriptome by RSEM were then aligned to a database of possible splice junctions, consisting of all possible combinations of 5' and 3' splice sites for each gene, with TopHat v2.0.8b<sup>8</sup>. Mapped reads from each procedure were merged together and used as input for subsequent analyses of isoform expression.

### Differential RNA splicing analysis

Isoform ratios for annotated splicing events were calculated using MISO v2.0<sup>5</sup>. Differential splicing was identified by comparing each mutant patient sample to the median of the SF3B1<sup>WT</sup> controls. The most robust events for each SF3B1 mutant group were identified by restricting the analysis to events with at least 20 informative reads per sample, an associated Bayes factor of  $\geq 5$  (computed using Wagenmakers' framework)<sup>9</sup>, and absolute change in isoform ratio of  $\geq 10\%$ . The top splicing events were defined as events with the greatest absolute change in isoform usage that occurred with significance in all samples from each mutation group.

### Isothermal titration calorimetry (ITC)

SRSF2 peptides were purified with the same protocol as previously described<sup>10</sup> and ITC was performed as previously described.<sup>11</sup> Briefly, cDNAs of SRSF2 WT and P95A, P95H, P95HL, and P95R mutants encoding amino acids 1-101 of SRSF2 (which encompasses the RNA recognition motif (RRM) of SRSF2) were cloned into the pet28a plasmid using the restriction sites *Bam*H1/*Xho*1. SRSF2 proteins were overexpressed at 37°C for 3 h in *Escherichia coli* *BL21 (DE3) codon plus* cells in minimal M9 medium (1 g l<sup>-1</sup> <sup>15</sup>N-NH<sub>4</sub>Cl, 2 g l<sup>-1</sup> <sup>13</sup>C-glucose) using 0.1 mM IPTG. Protein was then purified by two successive nickel affinity chromatography steps and dialysed against an NMR buffer (50 mM L-Glu, 50 mM L-Arg and 20 mM Na<sub>2</sub>HPO<sub>4</sub>/NaH<sub>2</sub>PO<sub>4</sub> at pH 5.5). A last purification step by size exclusion chromatography with a Superdex75 column (GE Healthcare) was necessary to remove residual RNases in the solution. The protein could be concentrated to over 2 mM with a 10-kDa molecular mass cutoff membrane.

To perform ITC, 5'-uCCAGu-3' RNA oligonucleotide ligand was utilized. This RNA was purchased from Dharmacon, deprotected according to the manufacturer's protocol, purified by butanol extraction, lyophilized and resuspended in NMR buffer. ITC measurements were conducted either on a MicroCal VP-ITC or MicroCal iTC200 instrument, which were calibrated according to the manufacturer's protocol. Concentrations of RNA and protein were calculated based on their optical density absorbance at 260 nm or 280 nm, respectively. The sample cell was loaded with either 1.4ml (VP-ITC) of 10  $\mu$ M RNA and the syringe with 200  $\mu$ M of protein, or 0.25ml (iTC200) of 10  $\mu$ M protein and the syringe with 200 $\mu$ M RNA. Measurements were done at 37°C in the final buffer using either 35 injections of 6  $\mu$ l protein (VP-ITC) or 21 injections of 2  $\mu$ l RNA (iTC200). Data was integrated and normalized using the Origin 7.0 software according to a 1:1 RNA:protein ratio binding model.

**Supplementary Figure 1**

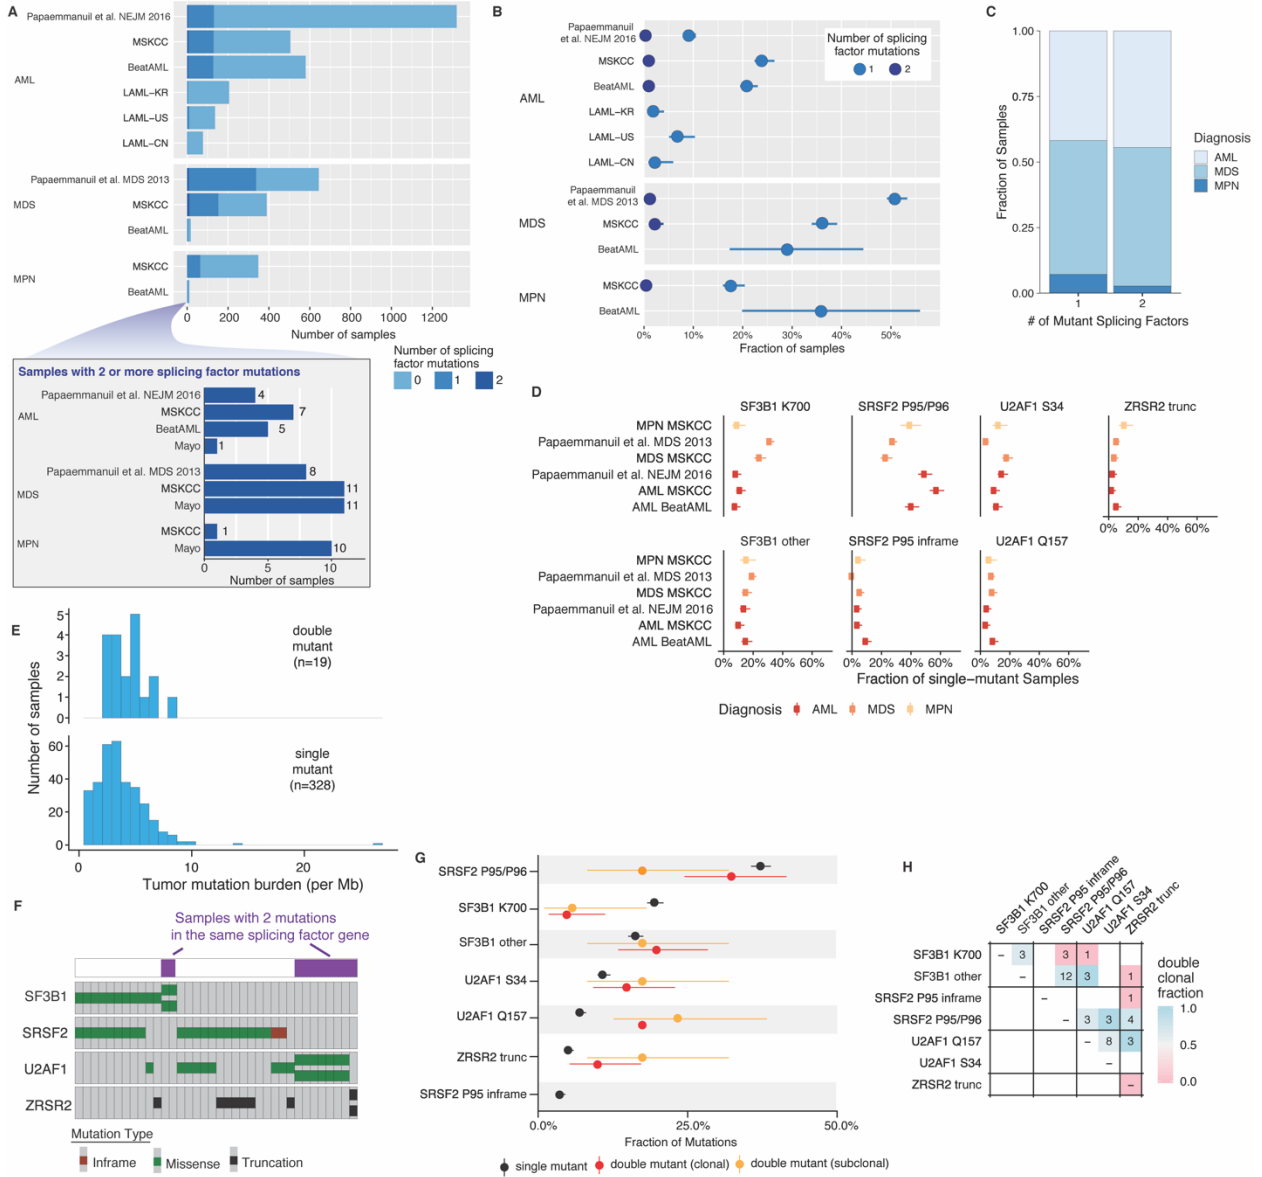

**Supplementary Figure 1. Characteristics of study cohort and genetic alterations in splicing factors analyzed.** (A) Histogram of patients with acute myeloid leukemia (AML), myelodysplastic syndromes (MDS), and myeloproliferative neoplasms (MPNs) with zero, one, or two mutations in RNA splicing factors studied here. Inset shows exact numbers of patients with two mutant splicing factors. (B) Percentage of samples within each study that contain one or two mutations in RNA splicing factors. (C) Fraction of samples with diagnosis of AML, MDS, or MPN based on presence of one versus two RNA splicing factor mutations. (D) Percentage of samples amongst single mutants that contained mutations at the SF3B1<sup>K700</sup>, SRSF2<sup>P95/P96</sup>, U2AF1<sup>S34</sup>, or U2AF1<sup>Q157</sup> residues, other residues of SF3B1 (“SF3B1 other”), inframe deletions or insertions around the SRSF2<sup>P95</sup> residue (“SRSF2 P95 inframe”), and ZRSR2 truncating mutations (“ZRSR2 trunc”). (E) Histogram of tumor mutational burden in patients with two or more (top; “double mutant”) mutant splicing factors versus a single mutant splicing factor (bottom). (F) OncoPrint of patients with two splicing factor mutations with annotation to describe patients with >1 mutation within the same gene. (G) Percentage of patients with mutations in

SRSF2, SF3B1, U2AF1, and ZRSR2 as a single mutation (in black) or dual mutation where  $\geq 1$  mutation was subclonal (orange) or both were clonal (red). Error bars show one standard deviation, based on a binomial distribution. **(H)** Plot describing number of patients with co-existing mutant alleles in splicing factors restricted to double-mutant patients where both mutations were clonal. The expected number was based on the fraction of samples with exactly two mutations under the assumption of no mutual exclusivity and using a Poisson distribution.

Supplementary Figure 2

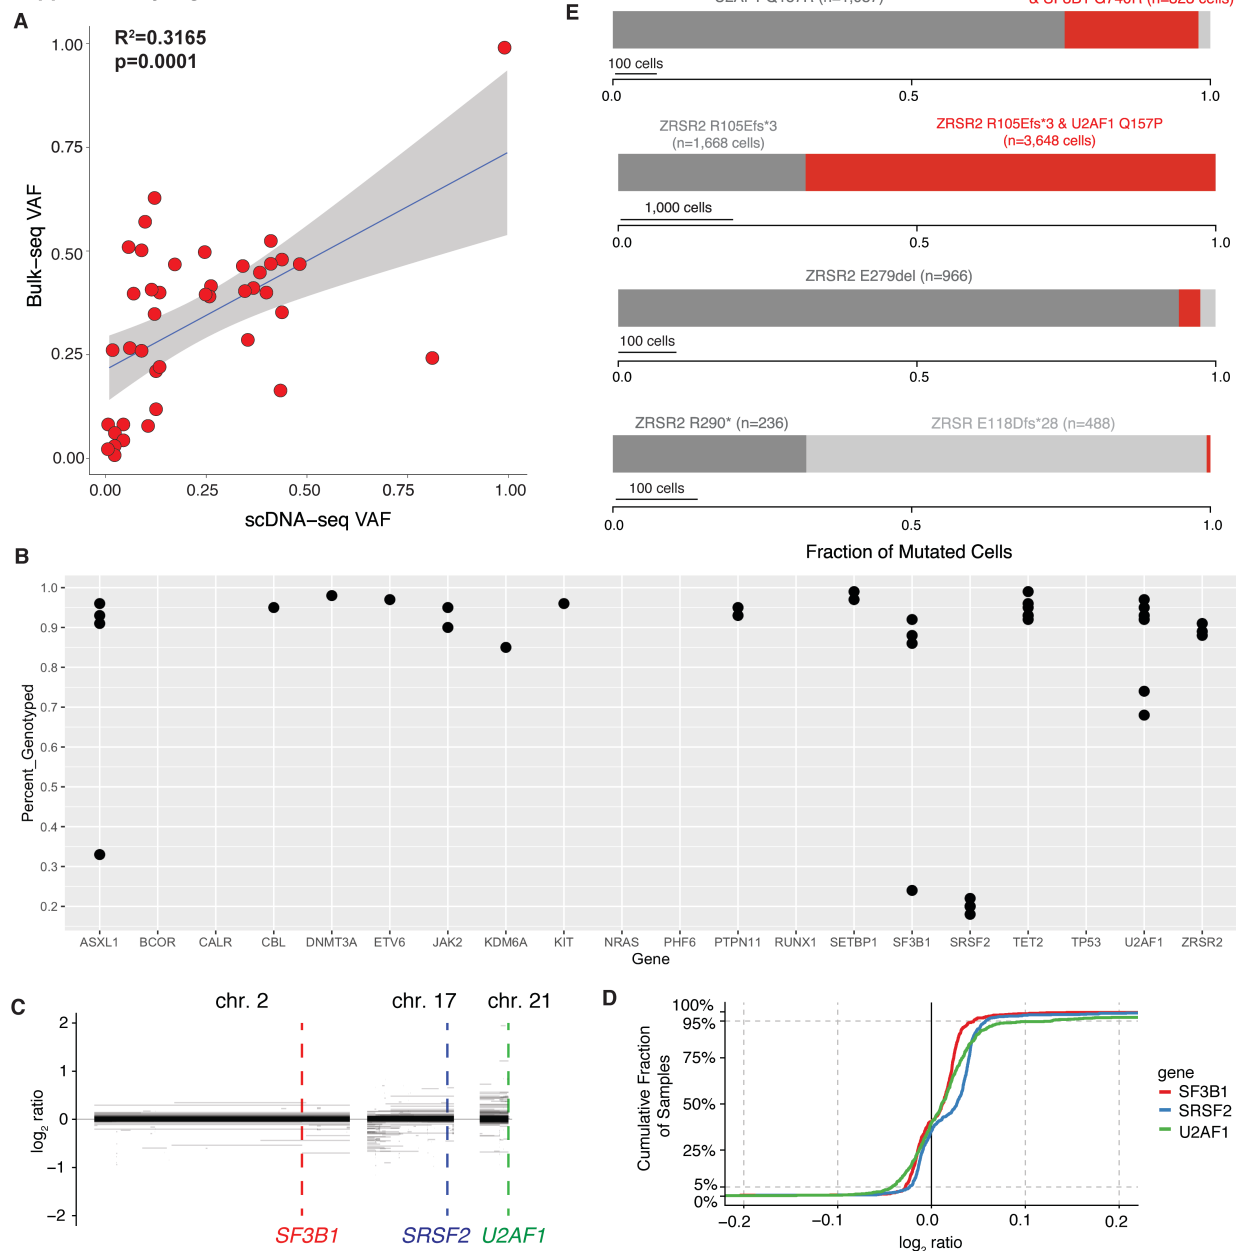

**Supplementary Figure 2. Single cell genomic analysis of myeloid neoplasm patients bearing two mutations in RNA splicing factors. (A)** Correlation of the variant allele fraction (VAF) from bulk sequencing and single cell DNA sequencing. The X-axis shows the VAF from the single-cell genotype data (scDNA-seq VAF). The Y-axis shows the VAF from the bulk next-generation sequencing (bulk VAF). Each dot represents a detected variant. The linear trendline was added to best fit the distribution of the dots. The shaded area around the trendline represents the 95% confidence intervals. **(B)** Genotyping efficiencies from scDNA-seq for each gene sequenced. Each dot represents a detected variant. **(C)** Copy number profiles for the 600 samples in the cohort for which they could be reliably determined (all derived using MSK IMPACT data). **(D)** Cumulative distribution of tumor/normal log-ratio at each splicing factor locus. Fewer than 5% of samples had a log<sub>2</sub>ratio more extreme of  $\pm 0.1$  and fewer than 3% had a log<sub>2</sub>ratio of more extreme of  $\pm 0.2$ . **(E)** Fraction of mutated cells with one or two mutations in

RNA splicing factors within each unique dual splicing factor mutant patient. Red bar denotes fraction of individual cells where two mutations were identified within the same cell.

### Supplementary Figure 3

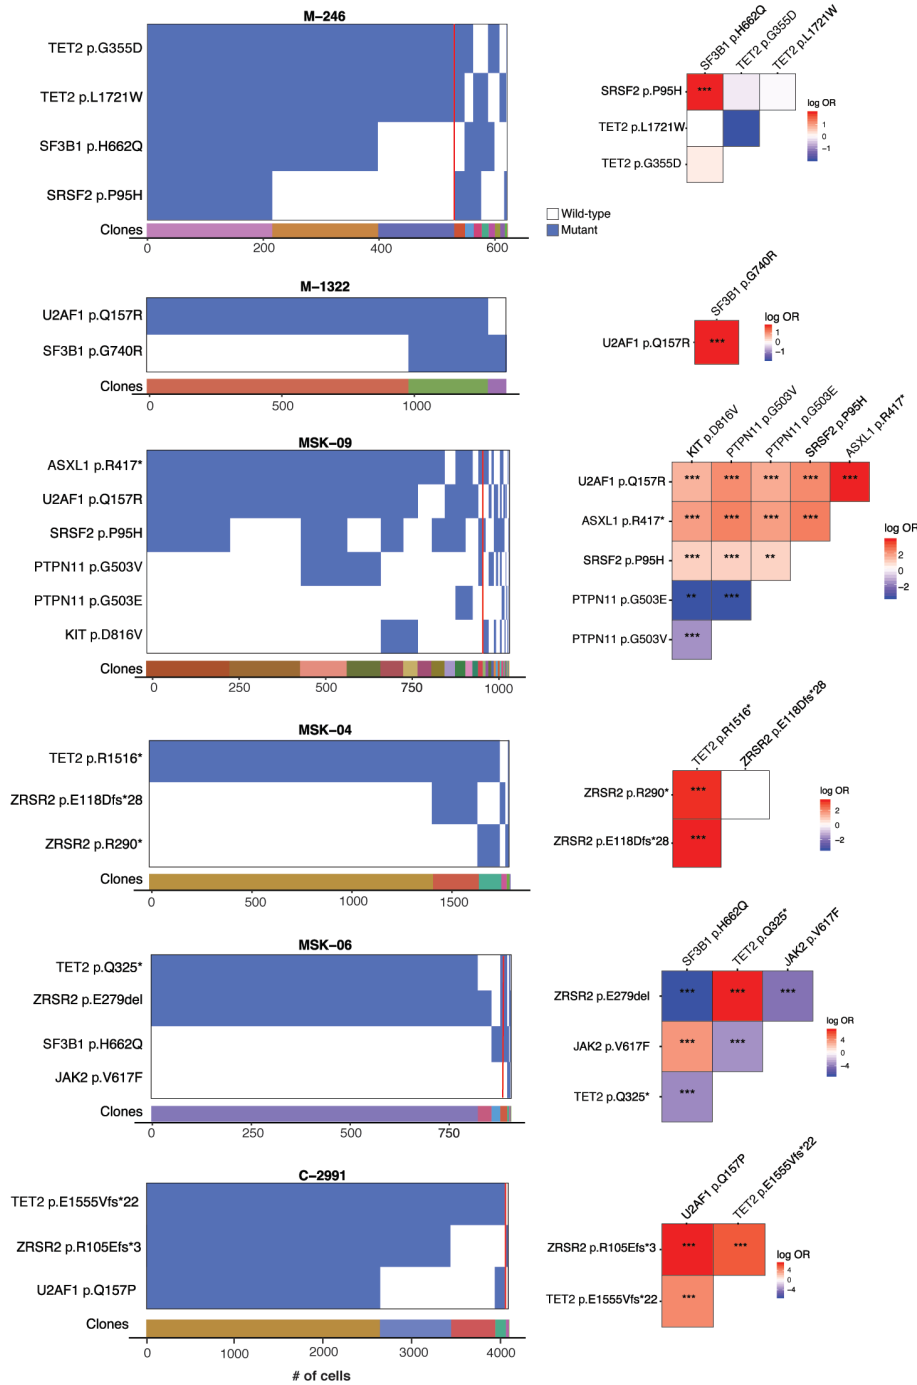

**Supplementary Figure 3. Oncoprints of mutations in individual cells of dual splicing factor mutant myeloid neoplasm patients. (A)** Cellular-level co-occurrence of mutations in select double-splicing factor mutant patient cases (clinical diagnosis and sample ID are listed above each oncoprint). Oncoprint (left) shows the genotype of each sequenced cell for each variant, with clustering based on the genotypes of driver mutations. Each column represents a cell at the indicated scale. Mutant and wild-type cells are indicated in blue and white, respectively. The subclones located to the right of the red line comprised <1% of the total sequence cells, since such small subclones can represent false positive or negative genotypes



as a result of allele-drop out or multiplets. The figures on the right show the pairwise association of mutations. The color and size of each panel represent the degree of the logarithmic odds ratio (log OR). The vertical bar is a key indicating the association of the colors with the log OR. Co-occurrence and mutual exclusivity are indicated by red and blue, respectively. The statistical significance of the associations based on the false discovery rate (FDR) is indicated by the asterisks (\*FDR < 0.1, \*\*FDR < 0.05, \*\*\*FDR < 0.001).

## Supplementary Figure 4

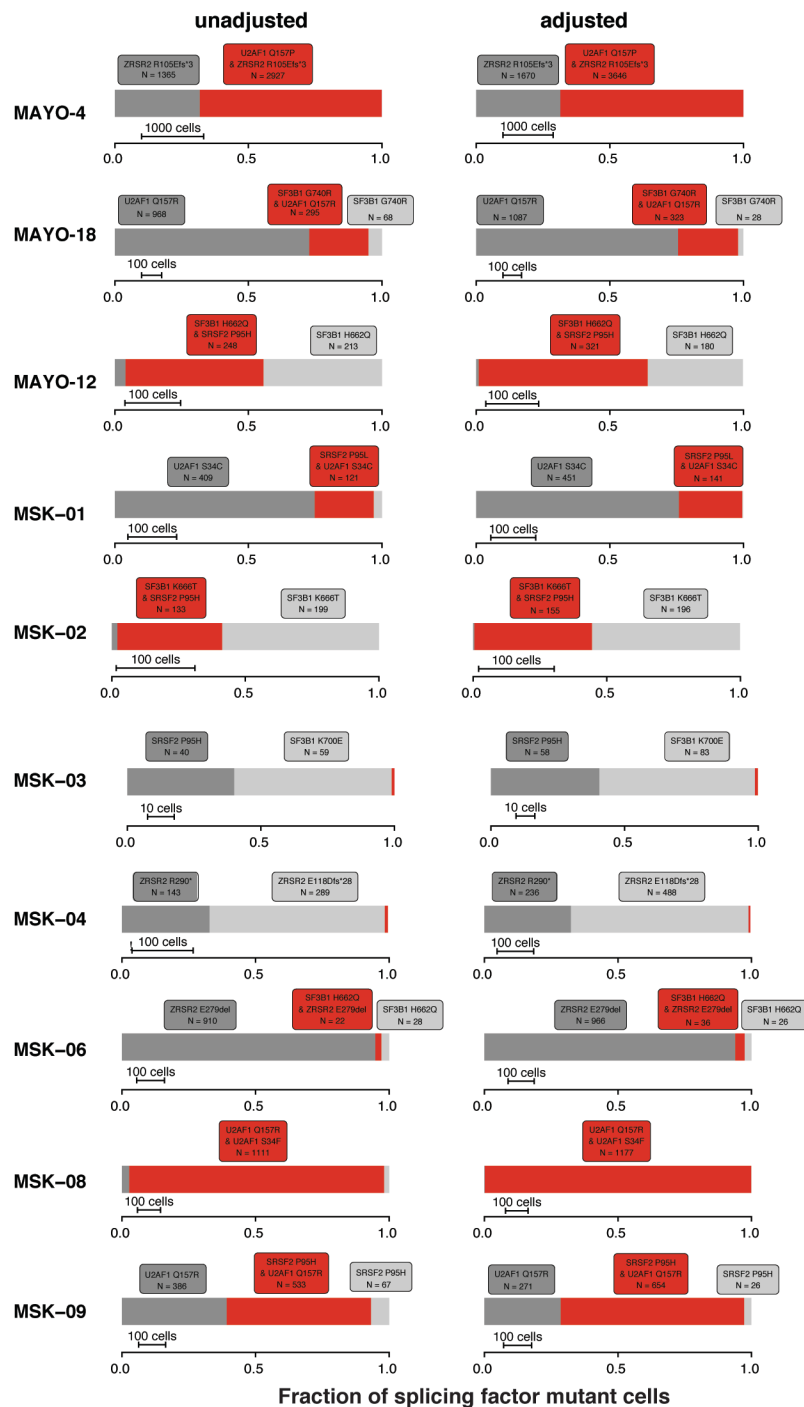

**Supplementary Figure 4. Clonal structure of RNA splicing factor mutations in double mutant patients before and after adjustments for allele dropout (ADO).** ADO was adjusted under the assumptions that i) mutant and wild-type alleles are equally likely to be amplified and ii) mutations are consistently heterozygous in diploid cells. The left panel shows unadjusted estimates of mutant subclones within each patient. The right panel shows adjusted estimates in corresponding patients. Red bar denotes fraction of cells with both splicing factor mutations. Gray bars denote fraction of cells with one of the two splicing factor mutations.

Supplementary Figure 5

A

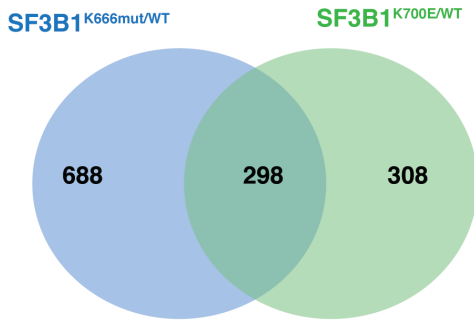

B

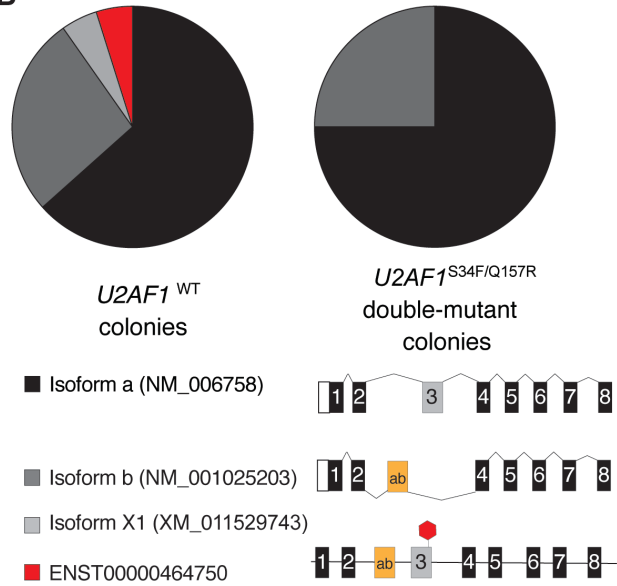

**Supplementary Figure 5. Allele-specific differences in splicing based on SF3B1 mutational hotspot and *U2AF1* isoform usage in *U2AF1*<sup>WT</sup> versus *U2AF1*<sup>S34F/Q157R</sup> double mutant cells.** (A) Venn diagram illustrating the overlap between differentially spliced events in SF3B1<sup>K700E</sup> and SF3B1<sup>K666</sup> mutant versus WT samples. (B) Pie-chart distribution of *U2AF1* mRNA isoforms in *U2AF1*<sup>WT</sup> and *U2AF1*<sup>S34F/Q157R</sup> double-mutant clones. Abbreviations: CMML: chronic myelomonocytic leukemia; PMF: primary myelofibrosis; t-MDS: therapy-related myelodysplastic syndrome.

## Supplemental References

1. Carpenter B, Gelman A, Hoffman MD, et al. Stan: A Probabilistic Programming Language. *2017*. 2017;76(1):32.
2. Dvinge H, Ries RE, Ilagan JO, Stirewalt DL, Meshinchi S, Bradley RK. Sample processing obscures cancer-specific alterations in leukemic transcriptomes. *Proc Natl Acad Sci U S A*. 2014;111(47):16802-16807.
3. Flicek P, Ahmed I, Amode MR, et al. Ensembl 2013. *Nucleic Acids Res*. 2013;41(Database issue):D48-55.
4. Meyer LR, Zweig AS, Hinrichs AS, et al. The UCSC Genome Browser database: extensions and updates 2013. *Nucleic Acids Res*. 2013;41(Database issue):D64-69.
5. Katz Y, Wang ET, Airoidi EM, Burge CB. Analysis and design of RNA sequencing experiments for identifying isoform regulation. *Nat Methods*. 2010;7(12):1009-1015.
6. Li B, Dewey CN. RSEM: accurate transcript quantification from RNA-Seq data with or without a reference genome. *BMC Bioinformatics*. 2011;12:323.
7. Langmead B, Trapnell C, Pop M, Salzberg SL. Ultrafast and memory-efficient alignment of short DNA sequences to the human genome. *Genome Biol*. 2009;10(3):R25.
8. Trapnell C, Pachter L, Salzberg SL. TopHat: discovering splice junctions with RNA-Seq. *Bioinformatics*. 2009;25(9):1105-1111.
9. Wagenmakers EJ, Lodewyckx T, Kuriyal H, Grasman R. Bayesian hypothesis testing for psychologists: a tutorial on the Savage-Dickey method. *Cogn Psychol*. 2010;60(3):158-189.
10. Daubner GM, Clery A, Jayne S, Stevenin J, Allain FH. A syn-anti conformational difference allows SRSF2 to recognize guanines and cytosines equally well. *EMBO J*. 2012;31(1):162-174.
11. Kim E, Ilagan JO, Liang Y, et al. SRSF2 Mutations Contribute to Myelodysplasia by Mutant-Specific Effects on Exon Recognition. *Cancer cell*. 2015;27(5):617-630.

**Supplementary Table 1. All splicing factor mutations included in analysis.**

| Splicing Factor | Mutation (count)                                                                                                                                                                                                                                                                                                                                                                                                                                                                                                                                                                                                                                                                          |
|-----------------|-------------------------------------------------------------------------------------------------------------------------------------------------------------------------------------------------------------------------------------------------------------------------------------------------------------------------------------------------------------------------------------------------------------------------------------------------------------------------------------------------------------------------------------------------------------------------------------------------------------------------------------------------------------------------------------------|
| SF3B1           | K700E (188), K666N (51), K666R (16), K666T (12), K666Q (7), K666E (2), K666M (2), H662Q (26), H662D (3), H662Y (1), E622D (20), E622V (2), R625L (9), R625C (8), R625G (2), N626D (1), G740E (2), G740R (2), V701F (2), I704N (2), Y623C (1), T663I (1), G742D (1), X833_splice (3), X742_splice (1)                                                                                                                                                                                                                                                                                                                                                                                      |
| SRSF2           | P95H (185), P95L (99), P95R (67), P95T (9), P95A (6), P95_R102del (23), R94dup (13), P96L (12), P96Rfs*136 (1), S101Rfs*21 (11)                                                                                                                                                                                                                                                                                                                                                                                                                                                                                                                                                           |
| U2AF1           | S34F (97), S34Y (16), S34C (1), Q157P (54), Q157R (32)                                                                                                                                                                                                                                                                                                                                                                                                                                                                                                                                                                                                                                    |
| ZRSR2           | R290* (6), R295* (5), R126* (3), W340* (3), K29Efs*26 (2), W75* (2), W291* (2), K16Ifs*40 (1), Y18* (1), R30Vfs*8 (1), E33Lfs*23 (1), R36* (1), E46* (1), E49* (1), I53Mfs*6 (1), L71* (1), X104_splice (1), R105Efs*3 (1), Q110* (1), E118Dfs*28 (1), E123Gfs*42 (1), E133* (1), W153* (1), Q154* (1), N155Tfs*10 (1), R169* (1), C181* (1), S188* (1), K190Nfs*48 (1), Q213* (1), Q235* (1), L237* (1), Y240* (1), D242Efs*13 (1), V253Sfs*36 (1), F256Lfs*32 (1), X258_splice (1), Q275* (1), X276_splice (1), S285Ffs*4 (1), F287Lfs*18 (1), E279del (1), C312Vfs*? (1), X313_splice (1), Q319* (1), N343Ifs*? (1), L348* (1), E365Gfs*? (1), Y373* (1), E394Nfs*? (1), R467Vfs*? (1) |

**Supplementary Table 2. All patient samples with double splicing factor mutations.**

| Study | Sample  | Diagnosis              | Category | Mutation 1         | VAF 1 | Mutation 2          | VAF 2 | Cytogenetics                                                  |
|-------|---------|------------------------|----------|--------------------|-------|---------------------|-------|---------------------------------------------------------------|
| Mayo  | MAYO-2  | CMML                   | MDS/MPN  | ZRSR2 p.R290*      | 0.67  | ZRSR2 p.N343lfs*?   | 0.20  | 45,X,-Y[20]                                                   |
| Mayo  | MAYO-4  | CMML                   | MDS/MPN  | ZRSR2 p.R105Efs*3  | 0.92  | U2AF1 p.Q157P       | 0.47  | 46,XY[20]                                                     |
| Mayo  | MAYO-5  | CMML                   | MDS/MPN  | SF3B1 p.K700E      | 0.23  | SRSF2 p.P95H        | N/A   | 46,XX[20]                                                     |
| Mayo  | MAYO-7  | CMML                   | MDS/MPN  | SF3B1 p.K700E      | 0.32  | SRSF2 p.P95L        | N/A   | 46,XX[20]                                                     |
| Mayo  | MAYO-8  | CMML                   | MDS/MPN  | SF3B1 p.Y623C      | N/A   | SRSF2 p.P95H        | N/A   | 46,XY[20]                                                     |
| Mayo  | MAYO-9  | CMML                   | MDS/MPN  | SRSF2 p.P95L       | N/A   | ZRSR2 p.E46*        | N/A   | 46,XY[20]                                                     |
| Mayo  | MAYO-10 | ET                     | MPN      | SF3B1 p.K666N      | 0.43  | SRSF2 p.P95H        | 0.11  | 46,XY[20]                                                     |
| Mayo  | MAYO-12 | PMF                    | MPN      | SRSF2 p.P95H       | 0.50  | SF3B1 p.H662Q       | 0.48  | 46,XX[30]                                                     |
| Mayo  | MAYO-13 | PMF                    | MPN      | U2AF1 p.Q157R      | 0.15  | U2AF1 p.S34F        | 0.14  | 46,XX,del(20)(q11.2q13.3)[13]/46,XX[7]                        |
| Mayo  | MAYO-16 | PMF                    | MPN      | U2AF1 p.Q157R      | 0.43  | U2AF1 p.S34Y        | 0.42  | 45,X,-X[20]                                                   |
| Mayo  | MAYO-18 | PMF                    | MPN      | U2AF1 p.Q157R      | 0.39  | SF3B1 p.G740R       | 0.12  | 46,XY dup(1q),del(13q),t(7;12)[17]/46,XY[3]                   |
| Mayo  | MAYO-20 | PMF                    | MPN      | ZRSR2 p.W153*      | 0.42  | ZRSR2 p.Y18*        | 0.35  | 46,XY,del(12)(p11.2p13)[2]/46,XY,del(13)(q12q22)[1]/46,XY[17] |
| Mayo  | MAYO-21 | PMF                    | MPN      | ZRSR2 p.W291*      | 0.40  | ZRSR2 p.R290*       | 0.07  | 46,XY[20]                                                     |
| Mayo  | MAYO-22 | PMF                    | MPN      | ZRSR2 p.F256Lfs*32 | 0.10  | SRSF2 p.P95_R102del | 0.05  | 46,XY[30]                                                     |
| Mayo  | MAYO-23 | PMF                    | MPN      | ZRSR2 p.L348*      | 0.77  | U2AF1 p.Q157R       | 0.47  | 46,XY[20]                                                     |
| Mayo  | MAYO-25 | PMF                    | MPN      | SF3B1 p.T663I      | 0.27  | U2AF1 p.Q157R       | 0.24  | 46,XY[20]                                                     |
| Mayo  | MAYO-27 | RARS                   | MDS      | SF3B1 p.K700E      | 0.33  | SRSF2 p.P95H        | 0.17  | 45,X,-Y [17]/46,XY[3]                                         |
| Mayo  | MAYO-28 | RARS                   | MDS      | SF3B1 p.H662D      | 0.31  | SF3B1 p.K700E       | 0.08  | 46,XX [20]                                                    |
| Mayo  | MAYO-29 | RARS                   | MDS      | SRSF2 p.P95L       | 0.38  | SF3B1 p.K666Q       | 0.38  | 46,XY[20]                                                     |
| Mayo  | MAYO-30 | RARS                   | MDS      | U2AF1 p.Q157R      | 0.41  | SF3B1 p.K666R       | 0.38  | 46,XY[20]                                                     |
| Mayo  | MAYO-32 | RARS_T                 | MDS      | SF3B1 p.G740E      | 0.50  | SRSF2 p.P95H        | 0.45  | 46,XX[20]                                                     |
| Mayo  | MAYO-33 | AML                    | AML      | SRSF2 p.P95H       | 0.45  | U2AF1 p.S34Y        | 0.44  | 48,XY,+8,+21[20]                                              |
| MSKCC | MSK-01  | CMML-2                 | MDS/MPN  | SRSF2 p.P95L       | 0.54  | U2AF1 p.S34C        | 0.47  | 47,XY,+8[20]                                                  |
| MSKCC | MSK-02  | MDS/MPN-U with >15% RS | MDS/MPN  | SF3B1 p.K666T      | 0.45  | SRSF2 p.P95H        | 0.50  | 46,XY[20]                                                     |
| MSKCC | MSK-03  | CMML-1                 | MDS/MPN  | SF3B1 p.K700E      | 0.27  | SRSF2 p.P95H        | 0.06  | 46,XX[20]                                                     |

|       |                   |                                  |         |                   |      |                    |      |                                                                                                                                                                                                                  |
|-------|-------------------|----------------------------------|---------|-------------------|------|--------------------|------|------------------------------------------------------------------------------------------------------------------------------------------------------------------------------------------------------------------|
| MSKCC | MSK-04            | MDS-MLD                          | MDS     | ZRSR2 p.R290*     | 0.13 | ZRSR2 p.E118Dfs*28 | 0.08 | 46,XY[20]                                                                                                                                                                                                        |
| MSKCC | MSK-06            | CMML-1                           | MDS/MPN | ZRSR2 p.E279del   | 0.24 | SF3B1 p.H662Q      | 0.26 | 45,X,-Y[17]/46,XY[3]                                                                                                                                                                                             |
| MSKCC | MSK-07            | AML, NOS                         | AML     | U2AF1 p.S34F      | 0.22 | SRSF2 p.P96Rfs*136 | 0.07 | 46,XY[20]                                                                                                                                                                                                        |
| MSKCC | MSK-08            | MDS-EB1                          | MDS     | U2AF1 p.S34F      | 0.40 | U2AF1 p.Q157R      | 0.26 | 46,XY[20]                                                                                                                                                                                                        |
| MSKCC | MSK-09            | Therapy-related myeloid neoplasm | AML     | U2AF1 p.Q157R     | 0.62 | SRSF2 p.P95H       | 0.29 | 44,XY,del(5)(q22q35),-7,add(13)(p11.2),del(16)(q?13q24),-18[9]/44,idem,dup(6)(p21.1p21.3),-17,+mar[5]/46,XY,del(12)(q15q24.1),del(17)(p11.2p13),del(17)(p11.2p13),add(17)(p11.2),del(20)(q11.2q13.3)[4]/46,XY[2] |
| MSKCC | P-0010290-T10-TB3 | AML                              | AML     | SRSF2 p.P95H      | 0.53 | SF3B1 p.E622V      | 0.09 | 46,XY,add(2)(q37),inv(3)(q21q26),inc[15]/46,XY[1]                                                                                                                                                                |
| MSKCC | P-0010874-T05-TB3 | MDS                              | MDS     | SRSF2 p.P96L      | 0.03 | SF3B1 p.E622V      | 0.03 | 46,XY[20]                                                                                                                                                                                                        |
| MSKCC | P-0017145-T05-IH3 | AML-MRC                          | AML     | U2AF1 p.Q157R     | 0.44 | U2AF1 p.S34F       | 0.44 | 46,XY[20]                                                                                                                                                                                                        |
| MSKCC | P-0017792-T01-TB3 | MDS                              | MDS     | SF3B1 p.R625C     | 0.54 | SF3B1 p.K700E      | 0.48 | 46,XX[20]                                                                                                                                                                                                        |
| MSKCC | P-0020445-T01-TB3 | MDS                              | MDS     | SF3B1 p.K700E     | 0.54 | SF3B1 p.K666N      | 0.04 | 46,XY[20]                                                                                                                                                                                                        |
| MSKCC | P-0022634-T01-TB3 | MDS                              | MDS     | U2AF1 p.S34F      | 0.42 | U2AF1 p.Q157R      | 0.05 | N/A                                                                                                                                                                                                              |
| MSKCC | P-0023073-T01-TB3 | MDS                              | MDS     | SRSF2 p.P95H      | 0.66 | U2AF1 p.Q157P      | 0.04 | 46,XX,del(5)(q13q31)[2]/46,X,del(X)(q22q28),del(2)(q33q37)[1]/47,XX,+15[1]/46,XX[26]                                                                                                                             |
| MSKCC | P-0026703-T03-IH3 | MDS                              | MDS     | ZRSR2 p.K29Efs*26 | 0.87 | SRSF2 p.P95L       | 0.45 | 46,XY[20]                                                                                                                                                                                                        |
| MSKCC | P-0027895-T04-IH3 | MDS-EB-1                         | MDS     | SRSF2 p.P95H      | 0.43 | SF3B1 p.H662Q      | 0.42 | 46,XY[20]                                                                                                                                                                                                        |
| MSKCC | P-0028132-T04-IH3 | MDS                              | MDS     | ZRSR2 p.L71*      | 0.86 | U2AF1 p.Q157P      | 0.26 | N/A                                                                                                                                                                                                              |
| MSKCC | P-0029855-T03-IH3 | AML                              | AML     | U2AF1 p.S34F      | 0.38 | U2AF1 p.Q157R      | 0.03 | 46,XY[20]                                                                                                                                                                                                        |
| MSKCC | P-0032923-T02-IH3 | AML                              | AML     | SRSF2 p.P95H      | 0.15 | U2AF1 p.Q157R      | 0.14 | 47,XY,t(4;6)(q31;q27),+13[1]/90~92,idemx2,inc[2]/46,XY[11]                                                                                                                                                       |
| MSKCC | P-0035091-T03-IH3 | MPN                              | MPN     | SF3B1 p.K666N     | 0.49 | SRSF2 p.P95H       | 0.17 | N/A                                                                                                                                                                                                              |

|                   |                      |                                  |         |                   |      |                    |      |     |
|-------------------|----------------------|----------------------------------|---------|-------------------|------|--------------------|------|-----|
| MSKCC             | P-0036187-T01-IH3    | MDS-RS-SLD                       | MDS     | SF3B1 p.E622D     | 0.30 | SRSF2 p.P95H       | 0.03 | N/A |
| MSKCC             | E-H-112901-T1-1-D1-1 | MPN                              | MPN     | SRSF2 p.P95A      | N/A  | SF3B1 p.K666N      | N/A  | N/A |
| BeatAML           | 13-00160             | AML-MRC                          | AML     | ZRSR2 p.R467Vfs*? | 0.83 | SRSF2 p.P95H       | 0.50 | N/A |
| BeatAML           | 14-00761             | AML-MRC                          | AML     | SRSF2 p.P95L      | 0.70 | SF3B1 p.K666N      | 0.48 | N/A |
| BeatAML           | 14-00774             | AML with minimal differentiation | AML     | ZRSR2 p.I53Mfs*6  | 0.93 | SRSF2 p.P95H       | 0.44 | N/A |
| BeatAML           | 16-00548             | AML-MRC                          | AML     | SF3B1 p.H662Q     | 0.33 | ZRSR2 p.W75*       | 0.12 | N/A |
| BeatAML           | 16-01223             | AML, NOS                         | AML     | U2AF1 p.Q157R     | 0.49 | U2AF1 p.S34F       | 0.43 | N/A |
| Papaemmanuil 2013 | PD6072a              | RAEB                             | MDS     | SRSF2 p.P95R      | N/A  | ZRSR2 p.E394Nfs*?  | N/A  | N/A |
| Papaemmanuil 2013 | PD6099a              | RCMD                             | MDS     | SRSF2 p.P95R      | N/A  | SRSF2 p.S101Rfs*21 | N/A  | N/A |
| Papaemmanuil 2013 | PD6106a              | RAEB                             | MDS     | SRSF2 p.P95R      | N/A  | SRSF2 p.S101Rfs*21 | N/A  | N/A |
| Papaemmanuil 2013 | PD6283a              | CMML                             | MDS/MPN | SRSF2 p.P95T      | N/A  | U2AF1 p.Q157R      | N/A  | N/A |
| Papaemmanuil 2013 | PD6504a              | RARS                             | MDS     | SF3B1 p.K666N     | N/A  | SRSF2 p.P95R       | N/A  | N/A |
| Papaemmanuil 2013 | PD6830a              | MDS                              | MDS     | SF3B1 p.K666Q     | N/A  | SRSF2 p.P95T       | N/A  | N/A |
| Papaemmanuil 2013 | PD7364a              | RAEB                             | MDS     | SRSF2 p.P95R      | N/A  | ZRSR2 p.V253Sfs*36 | N/A  | N/A |
| Papaemmanuil 2013 | PD7385a              | RAEB                             | MDS     | U2AF1 p.Q157R     | N/A  | U2AF1 p.S34F       | N/A  | N/A |
| Papaemmanuil 2016 | PD11136a             | AML                              | AML     | SF3B1 p.K666N     | 0.55 | SRSF2 p.P95H       | 0.36 | N/A |
| Papaemmanuil 2016 | PD7722a              | AML                              | AML     | U2AF1 p.S34Y      | 0.40 | SRSF2 p.P96L       | 0.32 | N/A |
| Papaemmanuil 2016 | PD8084a              | AML                              | AML     | U2AF1 p.S34F      | 0.45 | U2AF1 p.Q157R      | 0.42 | N/A |
| Papaemmanuil 2016 | PD8258a              | AML                              | AML     | U2AF1 p.Q157R     | 0.41 | SF3B1 p.K700E      | 0.06 | N/A |



**Supplementary Table 3. Patient samples selected for single cell DNA sequencing.**

| Sample  | Age | Sex | Diagnosis                              | Category | Mutation 1           | Mutation 2            | Additional Mutations                                                      |
|---------|-----|-----|----------------------------------------|----------|----------------------|-----------------------|---------------------------------------------------------------------------|
| MSK-01  | 76  | M   | CMML-2                                 | MDS/MPN  | U2AF1 p.S34C         | SRSF2 p.P95L          | TET2 p.G1361D;<br>ASXL1 p.L823*;<br>ETV6<br>p.X155 splice                 |
| MSK-02  | 65  | M   | MDS/MPN-U with<br>>15% RS              | MDS/MPN  | SF3B1 p.K666T        | SRSF2 p.P95H          | ASXL1<br>p.E635Rfs*15;<br>SETBP1<br>p.G870S;<br>CBL p.C396R               |
| MSK-03  | 74  | F   | CMML-1                                 | MDS/MPN  | SF3B1 p.K700E        | SRSF2 p.P95H          | TET2<br>p.P1725Sfs*4                                                      |
| MSK-04  | 68  | M   | MDS-MLD                                | MDS      | ZRSR2 p.R290*        | ZRSR2<br>p.E118Dfs*28 | TET2 p.R1516*                                                             |
| MSK-06  | 89  | M   | CMML-1                                 | MDS/MPN  | ZRSR2<br>p.E279del   | SF3B1 p.H662Q         | TET2 p.Q325*                                                              |
| MSK-07  | 54  | M   | AML, NOS                               | AML      | U2AF1 p.S34F         | SRSF2<br>p.P96Rfs*148 | TET2<br>p.N275Ifs*18                                                      |
| MSK-08  | 71  | M   | MDS-EB1                                | MDS      | U2AF1 p.S34F         | U2AF1 p.Q157R         | KDM6A<br>p.G1077E;<br>DNMT3A<br>p.C351Afs*56;<br>SETBP1<br>p.D868N        |
| MSK-09  | 77  | M   | Therapy-related<br>myeloid<br>neoplasm | AML      | U2AF1 p.Q157R        | SRSF2 p.P95H          | ASXL1 p.R417*;<br>PTPN11<br>p.G503V;<br>PTPN11<br>p.G503E;<br>KIT p.D816V |
| MAYO-4  | 70  | M   | CMML                                   | MDS/MPN  | ZRSR2<br>p.R105Efs*3 | U2AF1 p.Q157P         | TET2<br>p.E1555Vfs*22                                                     |
| MAYO-12 | 72  | F   | PMF                                    | MPN      | SF3B1 p.H662Q        | SRSF2 p.P95H          | TET2 p.G355D<br>TET2 p.L1721W                                             |
| MAYO-18 | 73  | M   | PMF                                    | MPN      | SF3B1 p.G740R        | U2AF1 p.Q157R         | N/A                                                                       |

\* scDNA-seq VAF: aggregated VAF of filtered cells across the sample based on read count

**Supplementary Table 4. Custom sequencing panel for single cell DNA sequencing.**

| AmpID | Variants                          | Protein             | Chr   | Start*    | End*      | Sequencing Primers                                                      |
|-------|-----------------------------------|---------------------|-------|-----------|-----------|-------------------------------------------------------------------------|
| 1     | DNMT3A:c.1051delT_1               | C351Afs*56          | chr2  | 25467416  | 25467632  | Fwd: AGTTGTTGTTTCCGCACATGA<br>Rev: GGCATGTCTTCAGGGCTTAGG                |
| 2     | DNMT3A:c.1051delT_2               | C351Afs*56          | chr2  | 25469960  | 25470217  | Fwd: TTGTTGTACGTGGCCTGGTG<br>Rev: CTGCACTCAGGTACTTCCCTA                 |
| 3     | SF3B1:c.2218G>A; 2098A>G          | G740R; K700E        | chr2  | 198266685 | 198266925 | Fwd: TCAAAAGGTAATTGGTGGATTTACCTT<br>Rev: GAGAATCTGGATGATATTGTGTAACCTAGG |
| 4     | SF3B1:c.1997A>C; 1986C>A; 1865A>T | K666T, H662Q; E622V | chr2  | 198267324 | 198267549 | Fwd: GCACAGCCCATAAGAATAGCTAT<br>Rev: CTGCTGGTCTGGCTACTATGAT             |
| 5     | KIT:c.2447A>T_1; 2447A>T_2        | D816V               | chr4  | 55599271  | 55599486  | Fwd: CCTTACTCATGGTCGGATCACAA<br>Rev: TTTGACTGCTAAAATGTGTGATATCCC        |
| 6     | TET2:c.822delC_1; 822delC_2       | N275lfs*18          | chr4  | 106155803 | 106156016 | Fwd: CAGATTGTGTTTCCATTGCGGT<br>Rev: TTAAGGATTATCAGCATCATCAG             |
| 7     | TET2:c.973C>T                     | Q325*               | chr4  | 106156035 | 106156262 | Fwd: TACCTGTTCCTTTCAGAAACCAGAA<br>Rev: GTGAACACTGAGCTTTGCTTGA           |
| 8     | TET2:c.2671delC                   | Q891Nfs*30          | chr4  | 106157747 | 106157972 | Fwd: TTCAAGAACAGGAGCAGAAGTCA<br>Rev: TGTAAAGAGATGCCACCTTAGAG            |
| 9     | TET2:c.4082G>A                    | G1361D              | chr4  | 106190626 | 106190861 | Fwd: GTGTCATTCCATTTTGTCTGGAT<br>Rev: TGAGCACAGAAGTCCAAACATG             |
| 10    | TET2:c.4393C>T                    | R1465*              | chr4  | 106193748 | 106193960 | Fwd: CGAGAATTTGGAGGAAAACCTGAG<br>Rev: AGCTTTCTTGGCTTCTAGTTTCC           |
| 11    | TET2:c.4546C>T                    | R1516*              | chr4  | 106196120 | 106196359 | Fwd: ACATTTAAGTATCCTCACTAGCCTTC<br>Rev: TCCAGAAGCAGAATAAGAGTTGAC        |
| 12    | TET2:c.5172dupT                   | P1725Sfs*4          | chr4  | 106196692 | 106196913 | Fwd: CCATACACTTTACCAGCCAAGG<br>Rev: ATGTTTGGATTGCTCAGATTGGG             |
| 13    | JAK2:c.1849G>T_1                  | V617F               | chr9  | 5073699   | 5073902   | Fwd: CTTTCTTTGAAGCAGCAAGTATGATGA<br>Rev: CTCCTGTAAATTATAGTTTACACTGACAC  |
| 14    | JAK2:c.1849G>T_2                  | V617F               | chr9  | 5122856   | 5123080   | Fwd: GCCTTTTAATCATAGAAGCCTCAG<br>Rev: CATAACAGAACCACTCCAAAGCTC          |
| 15    | CBL:c.1186T>C                     | C396R               | chr11 | 119148903 | 119149119 | Fwd: GGCTCCACATTCCAACATGTAAA<br>Rev: TTAAACCTAACCCCAAAGCCAG             |
| 16    | ETV6:c.463+2T>C                   | X155_splice         | chr12 | 12006467  | 12006694  | Fwd: GGTCATACTGCATCAGAACCATG<br>Rev: TGTACATCCATCTCACTGCTTCG            |
| 17    | PTPN11:c.1508G>A; 1508G>T         | G503E; G503V        | chr12 | 112926841 | 112927080 | Fwd: TATTGACGTTCCCAAACCATCC<br>Rev: ACAGTTGTCTATCAGAGCCTGT              |
| 18    | TP53:c.989T>C_1                   | L330P               | chr17 | 7572907   | 7573129   | Fwd: GGAACAAGAAGTGGAGAATGTGACG<br>Rev: TCTTGATTTGAATCCCGTTGTCC          |
| 19    | TP53:c.989T>C_2                   | L330P               | chr17 | 7576793   | 7577021   | Fwd: GGCATTTTGAAGTGTAGACTGGAA<br>Rev: GAGGTAAGCAAGCAGGACAAG             |

|    |                                                                        |                                        |       |          |          |                                                                     |
|----|------------------------------------------------------------------------|----------------------------------------|-------|----------|----------|---------------------------------------------------------------------|
| 20 | SRSF2:c.284_287delinsT; 287delC; 284C>A; 284C>T                        | P95_P96delinsL; P96Rfs*148; P95H; P95L | chr17 | 74732876 | 74733145 | Fwd: TTTACCTGCGGCTCCGGC<br>Rev: TCTTCGAGAAGTACGGGGCGC               |
| 21 | SETBP1:c.2602G>A; 2608G>A                                              | D868N; G870S                           | chr18 | 42531848 | 42532089 | Fwd: TAAAGGAAATCACGCTGTCCCC<br>Rev: CAGAAAGTTGTCCACAATGAGATGC       |
| 22 | ASXL1:c.1249C>T                                                        | R417*                                  | chr20 | 31021138 | 31021366 | Fwd: GGCTGAAATCAAAAGTGGCTTGT<br>Rev: CTTAGCCTCCCCATCCTTGTA          |
| 23 | ASXL1:c.1900_1922delAGAGAGG<br>CGGCCACCACTGCCAT; 1924G>T               | E635Rfs*15; G642*                      | chr20 | 31022365 | 31022634 | Fwd: TTAAAGCCCGTGCTCTGCA<br>Rev: TATGCTCCCCATTTAGAGGATAAGG          |
| 24 | ASXL1:c.2172delG                                                       | R725Efs*19                             | chr20 | 31022644 | 31022858 | Fwd: GAACTGCCATGTCCAGAGCT<br>Rev: CAACTGAGGCTGCTCCACTA              |
| 25 | ASXL1:c.2415dupC_1;<br>2423delC_1; 2415dupC_2;<br>2423delC_2; 2468delT | T806Hfs*16; P808Lfs*10; L823*          | chr20 | 31022872 | 31023111 | Fwd: GAACTGAATGTGAGTCTGGCAC<br>Rev: ATTCGTCATCAAATGCTCTGTTCTG       |
| 26 | ASXL1:c.3637_3640delCTCC                                               | L1213lfs*3                             | chr20 | 31024105 | 31024320 | Fwd: CTGGAGCACCCCAAAGAATTG<br>Rev: AGGTAGTAAGATCTCCTGGGCT           |
| 27 | U2AF1:c.470A>C; 470A>G                                                 | Q157P; Q157R                           | chr21 | 44514753 | 44514997 | Fwd: CTCCTCACTCACCCCATCTCATA<br>Rev: ACCTGAGTGTGTATATCTCTCTCTG      |
| 28 | U2AF1:c.101C>A; 101C>G;<br>101C>T                                      | S34Y; S34C;<br>S34F                    | chr21 | 44524417 | 44524634 | Fwd: AAACAAACCTGGCTAAACGTCG<br>Rev: AAAGTCTGTGCATGTTTCTGTGAG        |
| 29 | ZRSR2:c.83dupA                                                         | K29Efs*26                              | chrX  | 15809034 | 15809244 | Fwd: GTGTATATGTCTTAATCTTCCAGCCAC<br>Rev: TTCCTCCGACACAATATTTGACTTC  |
| 30 | ZRSR2:c.313del_1;<br>353_354insCTTT_1                                  | R105Efs*3;<br>E118Dfs*28               | chrX  | 15819440 | 15819677 | Fwd: CTCCAGGTTACACGATTCT<br>Rev: AGCTTAGAGACATTAAGAAATTTCCGGC       |
| 31 | ZRSR2:c.313del_2;<br>353_354insCTTT_2                                  | R105Efs*3;<br>E118Dfs*28               | chrX  | 15822125 | 15822364 | Fwd: TGATCTTATTCAGTTTGCCAGTGT<br>Rev: ATTCTTCAAACCTCATCACACAGCAC    |
| 32 | ZRSR2:c.835_837delGAA; 868C>T                                          | E279del; R290*                         | chrX  | 15838231 | 15838457 | Fwd: GGTCTACAATAAATTAATAACGGGGT<br>Rev: CATCACTTTGTCTTTTACCACAAATCG |
| 33 | BCOR:c.1888G>A                                                         | E630K                                  | chrX  | 39932523 | 39932739 | Fwd: AAACAGACTGCCATTGGGTAAC<br>Rev: CAACCCAGAACCGAGTTTCAA           |
| 34 | KDM6A:c.3230G>A_1                                                      | G1077E                                 | chrX  | 44938422 | 44938671 | Fwd: GGAAGCTAACAATGAACATATGGTAGA<br>Rev: AATGTGTCCTTTCAAACCTCCAAAG  |
| 35 | KDM6A:c.3230G>A_2                                                      | G1077E                                 | chrX  | 44941925 | 44942126 | Fwd: AAGGCATGTTTCTAATACTGTGTCTC<br>Rev: ATGAAACAGAAGAGGAAATTGTAGAGA |
| 36 | SMC1A:c.3152G>A_1; 3152G>A_2                                           | R1051Q                                 | chrX  | 53409459 | 53409679 | Fwd: AGATCTCATCAATGTTGGTAGCCA<br>Rev: CATTCTCTCTCTCAGTGGGAT         |

\* Reference genome: hg19

**Supplementary Table 5. Single cell DNA sequencing metrics.**

| <b>Sample</b> | <b>Cells</b> | <b>Reads</b> | <b>Reads per cell</b> | <b>Reads per amplicon per cell</b> |
|---------------|--------------|--------------|-----------------------|------------------------------------|
| MSK-01        | 4197         | 62000000     | 12204                 | 339                                |
| MSK-02        | 3578         | 63000000     | 14147                 | 393                                |
| MSK-03        | 6701         | 80000000     | 10090                 | 280                                |
| MSK-04        | 8585         | 68000000     | 6764                  | 188                                |
| MSK-06        | 1442         | 43000000     | 24101                 | 669                                |
| MSK-07        | 5288         | 45000000     | 7056                  | 196                                |
| MSK-08        | 9542         | 29000000     | 2526                  | 70                                 |
| MSK-09        | 10300        | 48000000     | 3933                  | 109                                |
| MAYO-4        | 10168        | 55000000     | 4681                  | 130                                |
| MAYO-12       | 4015         | 42000000     | 8326                  | 231                                |
| MAYO-18       | 14690        | 86000000     | 4934                  | 137                                |

**Supplementary Table 6. Characteristics of patients and samples used to evaluate effects of SF3B1 K700E versus K666 mutations on RNA splicing by RNA-sequencing<sup>†\*</sup>.**

| Sample ID | SF3B1 Status | Additional genetic alterations                     | Cytogenetics      | Disease     | Source | Blast % | Age | Sex | WBC  |
|-----------|--------------|----------------------------------------------------|-------------------|-------------|--------|---------|-----|-----|------|
| SLMSK_001 | WT           | KIT D816V, CEBPA H219fs*99, NUP98-NSD1 fusion      | inv(5q)           | AML         | PB     | 28      | 23  | M   | 2.4  |
| SLMSK_002 | WT           | EZH2 Y181*, RUNX1 P261fs, TET2 C1633X              | Normal            | MDS/MPN     | PB     | 7       | 62  | F   | 84   |
| SLMSK_003 | WT           | RUNX1 R201*, BCORL1 R945*                          | Normal            | AML         | PB     | 0       | 63  | M   | 6.3  |
| SLMSK_004 | WT           |                                                    |                   | AML         | BM     | 68      |     |     |      |
| SLMSK_005 | WT           | DNMT3A R326C, NRAS G13D                            | Normal            | AML         | BM     | 20      | 46  | M   | 3    |
| SLMSK_006 | WT           | CEBPA F6fs*12, CREBBP S1108*, PICALM-MLLT10 fusion | t(10;11)(p12;q21) | AML         | PB     | 55      | 35  | M   | 15.2 |
| SLMSK_007 | WT           | No mutations on Thunderbolt panel                  | Normal            | AML         | PB     | 5       | 71  | M   | 1.7  |
| SLMSK_008 | WT           | KIT D816V                                          | t(8;21)           | AML         | BM     | 72      | 35  | F   | 9.3  |
| SLMSK_011 | p.K700E      | None                                               | Normal            | AML         | PB     | 20      | 75  | F   | 6.3  |
| SLMSK_012 | p.K700E      |                                                    |                   | AML         | BM     |         |     |     |      |
| SLMSK_013 | p.K700E      |                                                    |                   | AML         | BM     |         |     |     |      |
| SLMSK_015 | p.K700E      | IDH1 R132H, JAK2 V617F                             | Complex           | AML with MF | PB     | 36      | 59  | F   | 2.5  |
| SLMSK_016 | p.K700E      | TP53 Y243C                                         | Normal            | MDS         | PB     | 0       | 88  | F   | 6.7  |
| SLMSK_017 | p.K700E      |                                                    |                   | MDS         | BM     | 1       |     |     |      |
| SLMSK_020 | p.K700E      | None                                               | Normal            | RARS        | BM     | 0       | 65  | M   | 3.8  |
| SLMSK_022 | p.K700E      | KRAS G12A                                          | Monosomy 7        | MDS>AML     | BM     | 46      | 78  | F   | 6.8  |
| SLMSK_023 | p.K700E      | TET2 C1464X, V430fs                                | Normal            | MDS         | BM     | 0       | 70  | M   | 9.6  |
| SLMSK_024 | p.K700E      |                                                    |                   | AML         | PB     | 73      |     |     |      |
| SLMSK_026 | p.K666N      |                                                    |                   | AML         | PB     | 20      |     |     |      |
| SLMSK_027 | p.K666M      | ASXL1 Q925X, RUNX1 A142fs                          | Normal            | MDS         | PB     | 2       | 83  | F   | 1.9  |
| SLMSK_028 | p.K666N      | None                                               | Normal            | MDS/MPN     | BM     | 7       | 61  | F   | 3.6  |
| SLMSK_030 | p.K666N      | None                                               | t(12;17)          | AML         | BM     | 60      | 63  | M   | 4    |
| SLMSK_032 | p.K666N      |                                                    |                   | AML         | BM     |         |     |     |      |
| SLMSK_033 | p.K666E      |                                                    |                   | AML         | BM     |         |     |     |      |

<sup>†</sup>Blank cells indicate information not known.

\***Abbreviations:** AML: acute myeloid leukemia; BM: bone marrow; MDS: myelodysplastic syndrome; MF: myelofibrosis; MPN: myeloproliferative neoplasm; PB: peripheral blood; RARS: refractory anemia with ring sideroblasts.
